# Supplementary material for: Hypoxia Promotes Osteoclast Differentiation through Weakening the USP18-Mediated Suppression on NF-κB Signaling Pathway
Source: Preprints.org preprint supplement (doi:10.20944/preprints202410.1450.v1), 2024-10-18
Supplement: Supplementary file 1 [file supplementary]

**Supplementary** **Figure 1.** Compared with the DMEM medium, the a-MEM medium was more effective in promoting RANKL-induced differentiation of RAW264.7 cells into osteoclasts. (a-c) Multinucleated cells were stained by TRAP staining and observed under light microscopy. (Scale bar, 200 μm) Data are presented as mean ± SD (n=3). (*P < .05, **P < .01, ***P < .001).


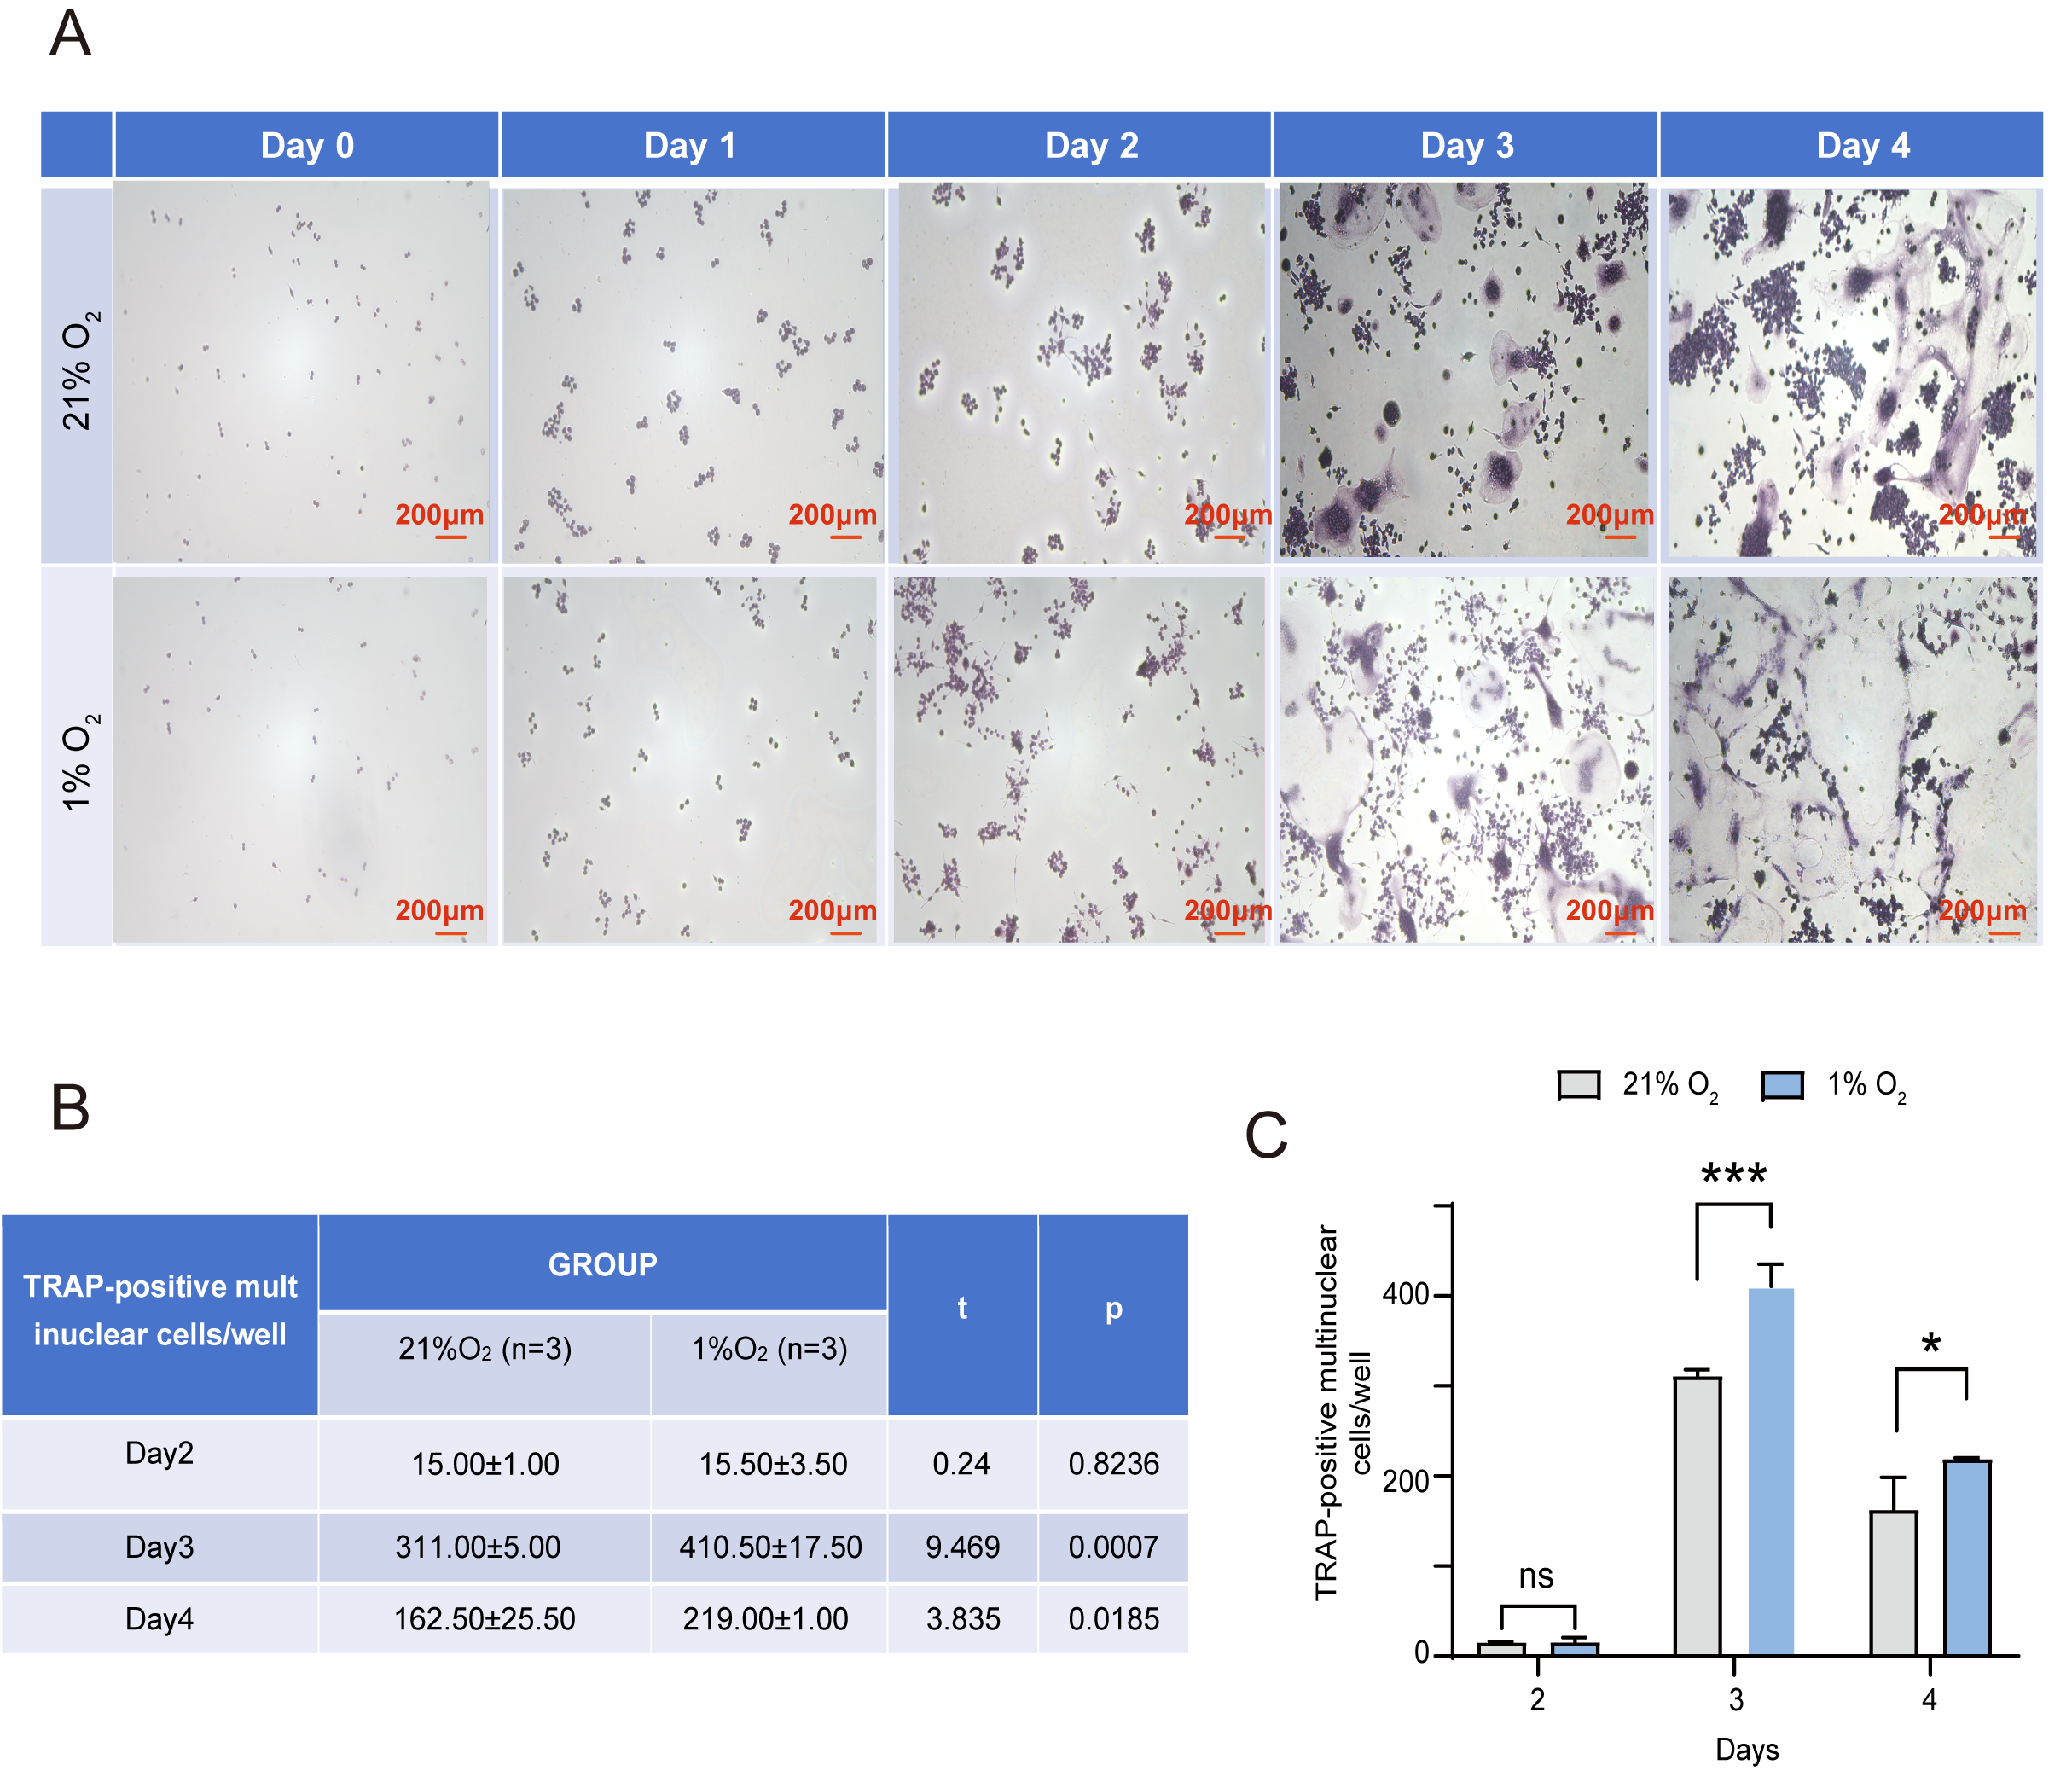


**Supplementary** **Figure 2.** Short-term hypoxia promotes osteoclastogenesis.During the critical period of osteoclast formation, RANKL-induced RAW264.7 cells were placed in a hypoxic incubator for 24 h. (a-c) Multinucleated cells were stained by TRAP staining and observed under light microscopy. (Scale bar, 200 μm) Data are presented as mean ± SD (n=3). (*P < .05, ***P < .001).


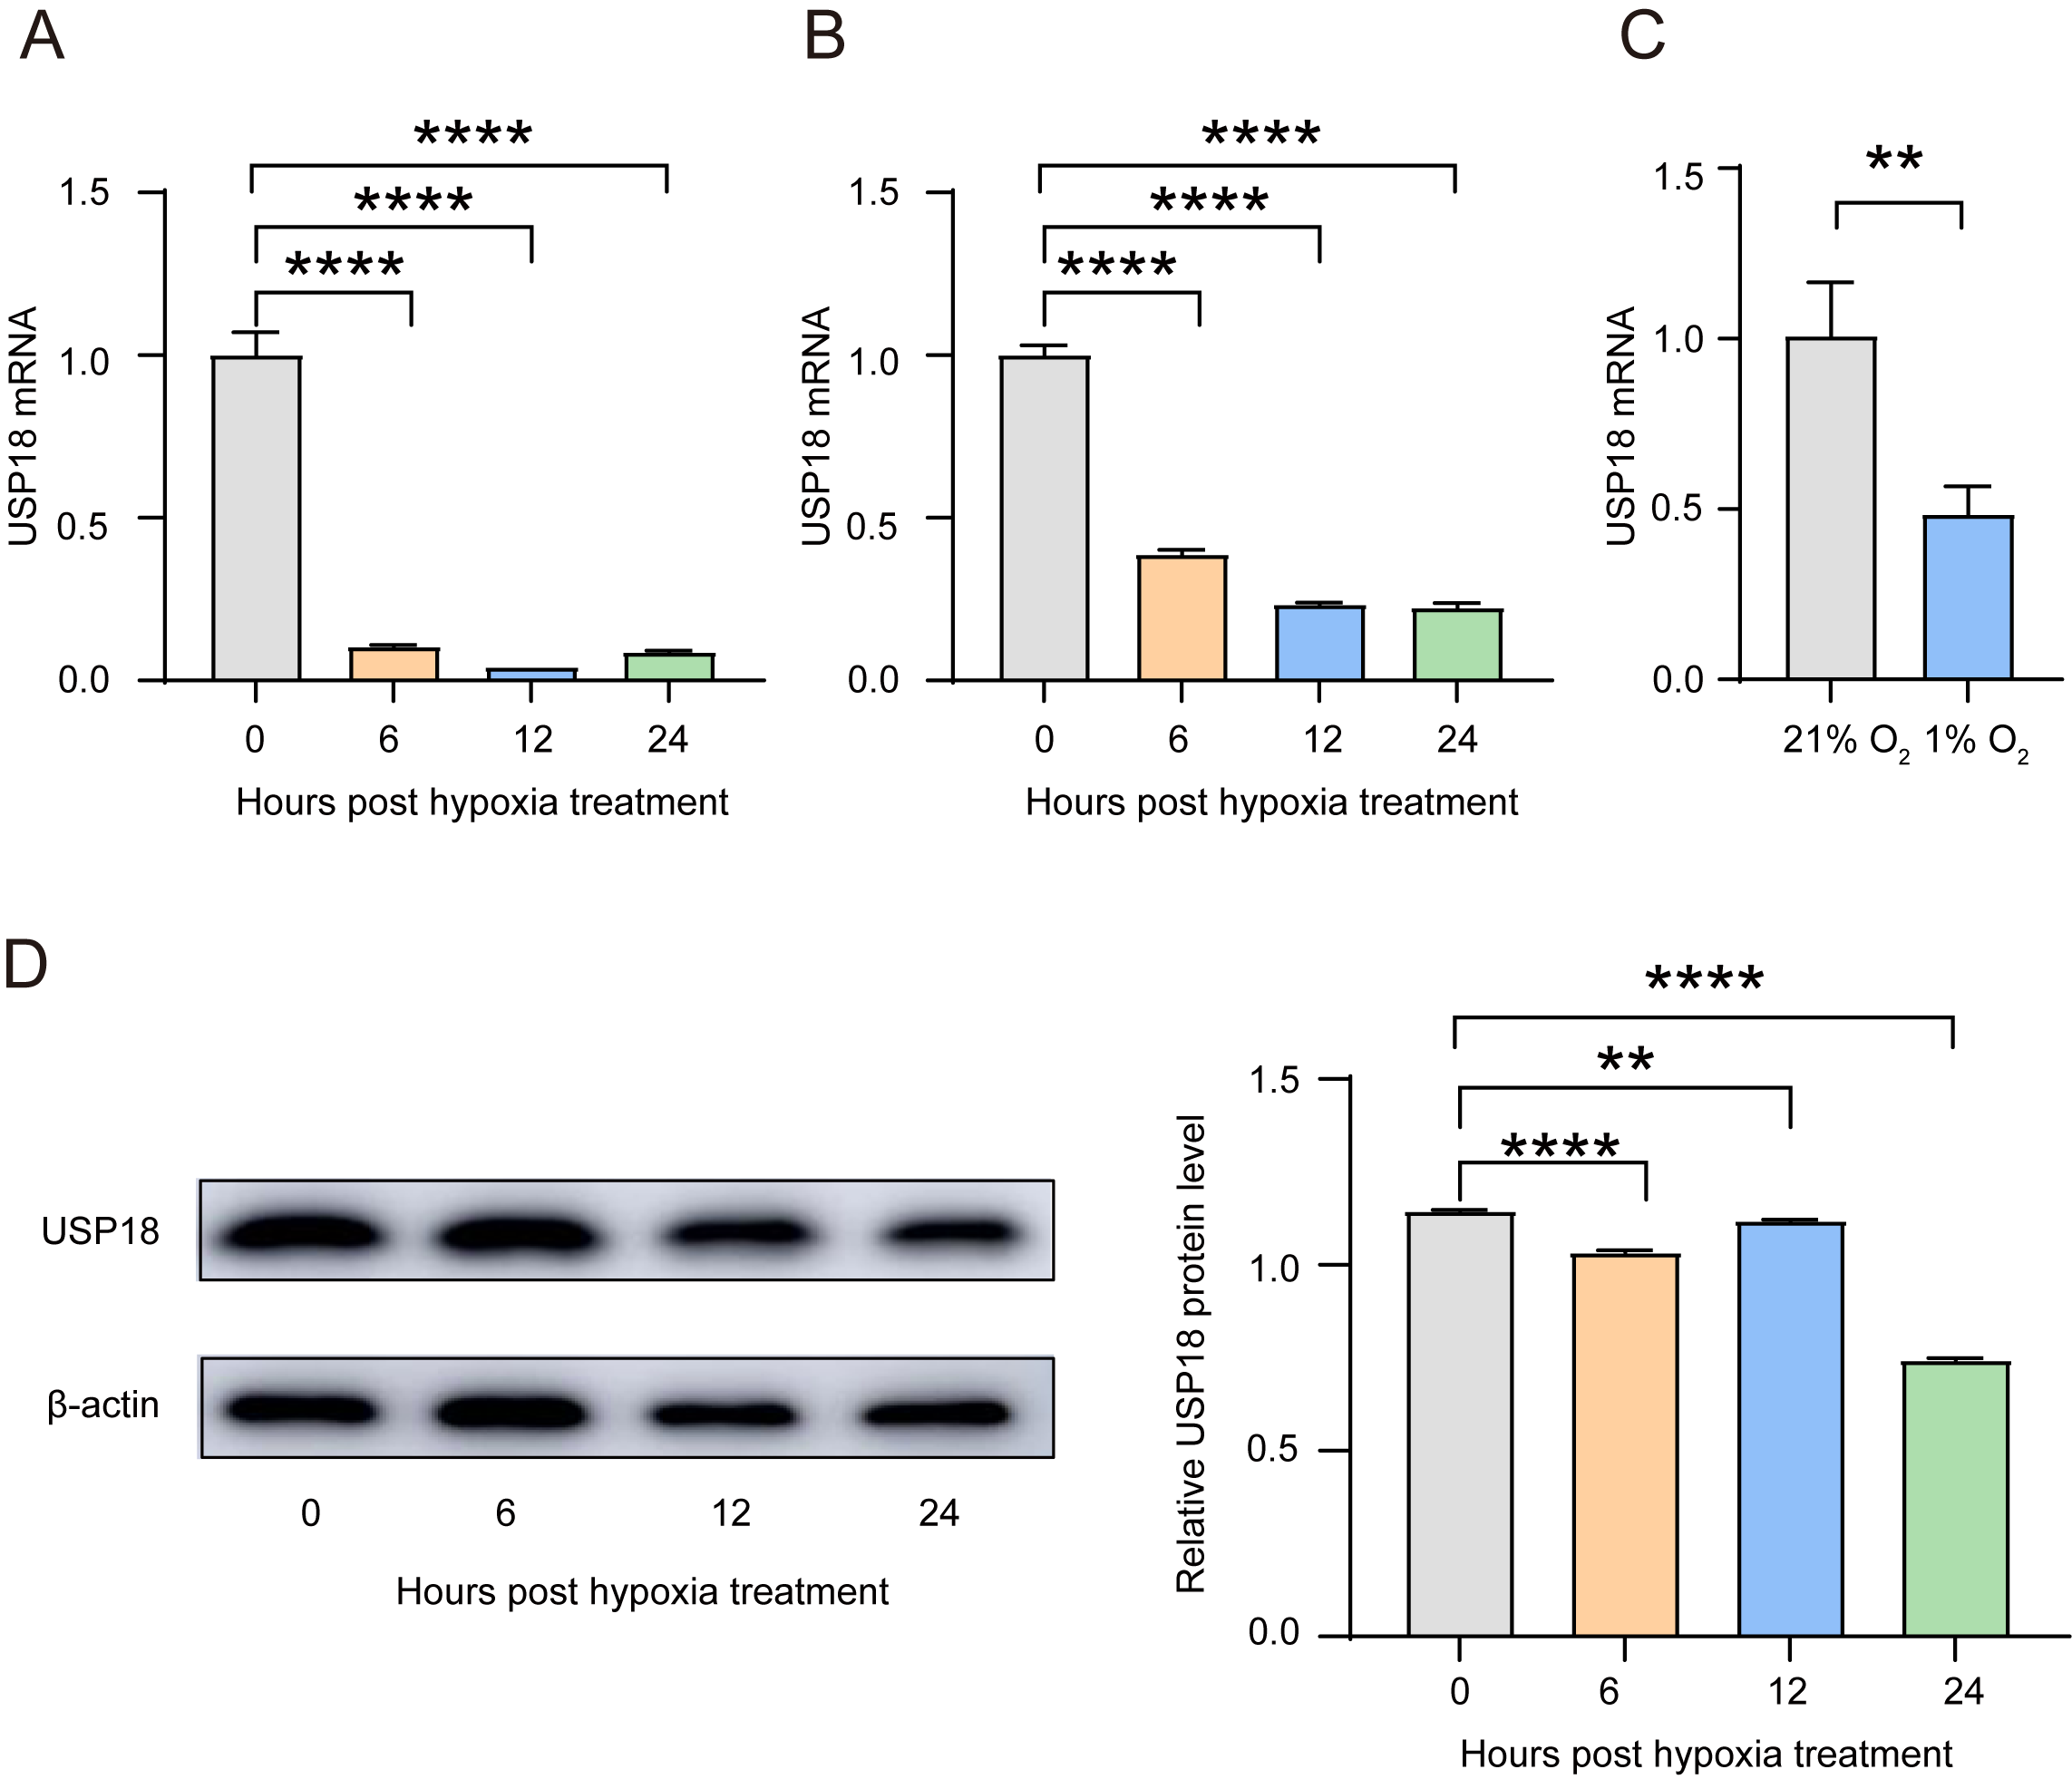


**Supplementary** **Figure 3.** Short-term hypoxia downregulates USP18 expression of BMDM. (a-c) Multinucleated cells were stained by TRAP staining and observed under light microscopy. (Scale bar, 200 μm). (d-g) qRT-PCR was performed using RNA isolated from RAW264.7 cells cultured in the presence of RANKL for 2days. Data represent mean values of 3 independent experiments. Data are presented as mean ± SD (n=3). (*P < .05, **P < .01, ***P < .001).

**
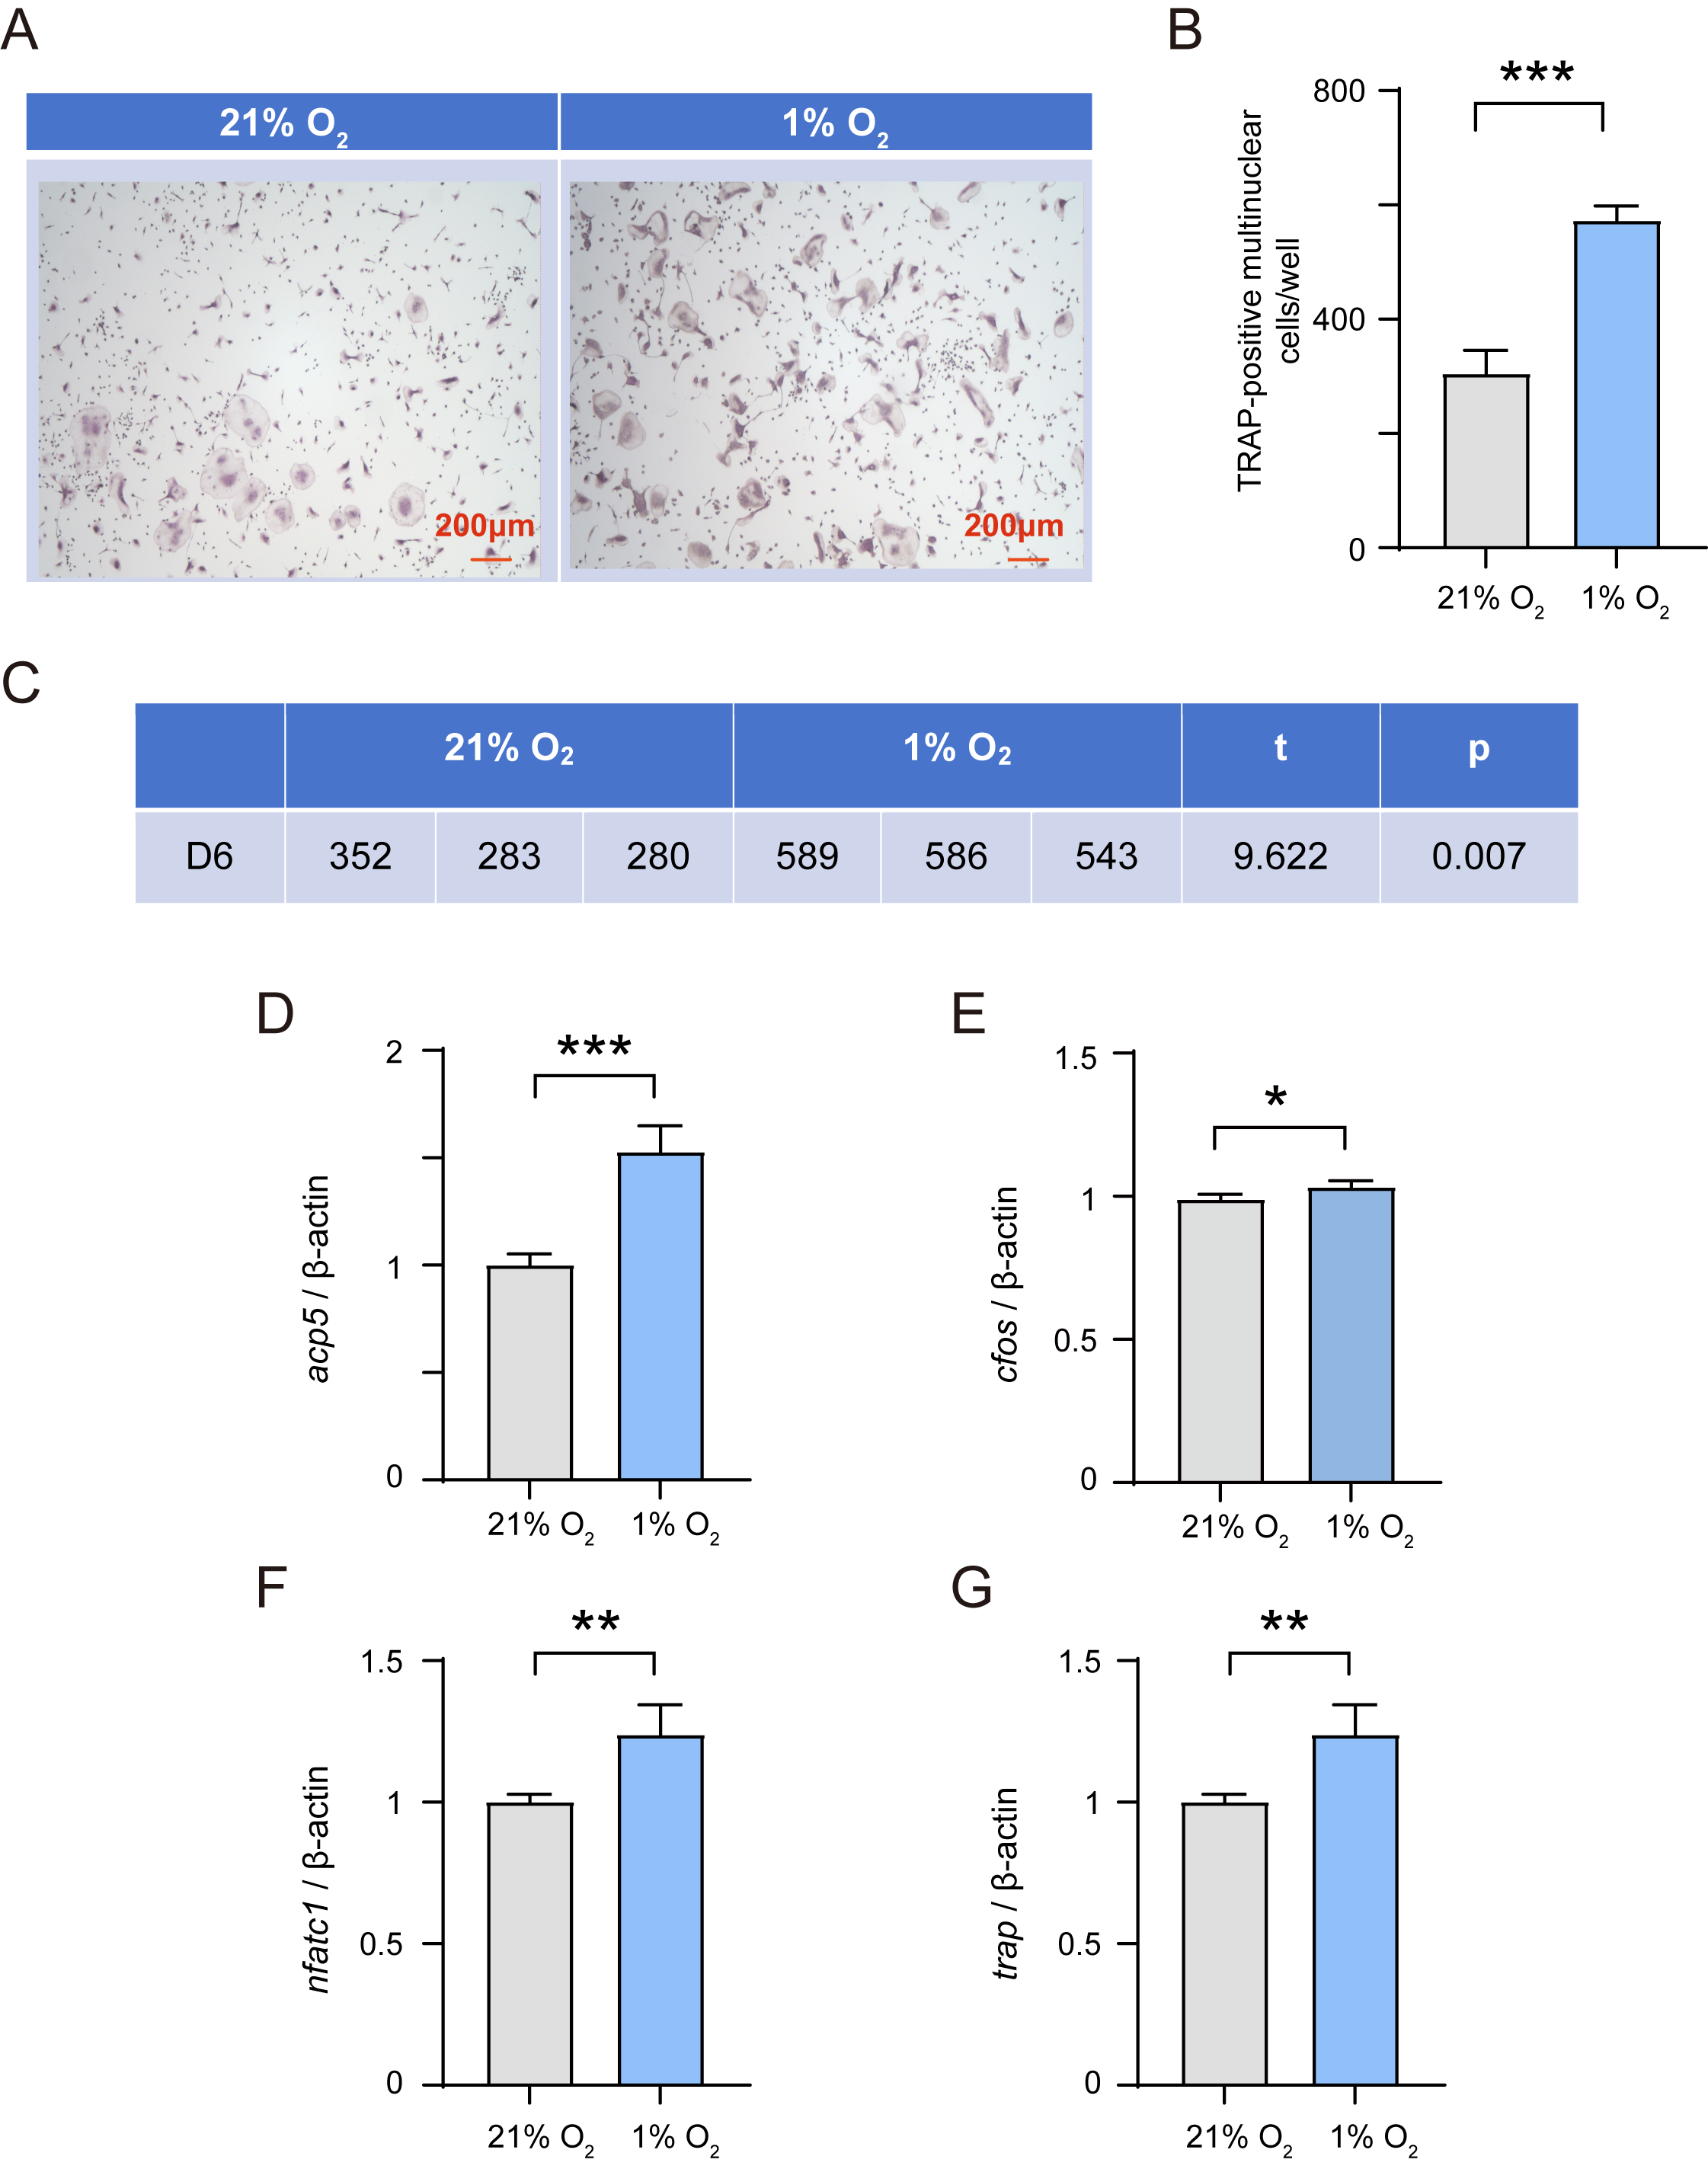
**

**Supplementary** **Figure 4.** Short-term hypoxia downregulates USP18 expression of RAW264.7 cells. (a) qRT-qPCR analysis of osteoclast-related gene expression for USP18. (d) The protein activation of USP18 was measured by immunoblotting with the indicated antibodies at different time points. Data are presented as mean ± SD, (n=3). (**P < .01, ****P < .0001).
